# Supplementary material for: Immersive competence as a source of bias in virtual reality clinical assessment
Source: NPJ Digit Med. 2026 Mar 9;9:280. doi: 10.1038/s41746-026-02482-z (PMC13049112; doi:10.1038/s41746-026-02482-z)
Supplement: Supplementary file 3 — Supplementary Data1 [file 41746_2026_2482_MOESM3_ESM.xlsx]

## Sheet: Tabelle1
Identification		1 O2-Monitoring			2 Blood Cultures			3 Arterial Blood Gas			4 Point-of-care ultrasound			5 Volume Replacement			6 Catecholamines			7 Empirical Antibiotics			8 Surcigal Consultation			9 ICU Transfer			Total VR Assessment		General IC Training		Specific IC Training		Subjective Cognitive Load		Procedural Efficiency		Person-specific characteristics					Self-reported usability barriers and performance impact
ID#	Group	R1	R2	Total	R1	R2	Total	R1	R2	Total	R1	R2	Total	R1	R2	Total	R1	R2	Total	R1	R2	Total	R1	R2	Total	R1	R2	Total	Raw Points	Clinical Performance (%)	PRE	POST	PRE	POST	TLX1	TLX2	SPT trained (Z-Score)	SPT untrained (Z-Score)	Age	Gender	Experience 3D-Applications	Experience VR-Applications	Academic Benchmark	How strongly was your clinical performance influenced by VR-hardware?	How strongly was your clinical performance influenced by VR-software?	I was so occupied with hardware/software that I could not focus on clinical content.	I had fun using VR technology.	I can imagine that VR-based examinations can yield fair and valid results in future.	The following changes would be necessary for VR-based examinations to be used as a genuine assessment tool in medical education:
1	I1	1	1	1	0	0	0	0	0	0	1	1	1	1	1	1	0	0	0	0	0	0	0	0	0	0	0	0	3	33.3333	41.82	56.195			45	84	-0.0906073	-0.213309	23	1	0	0	3	4	3	3	4	3	Vorher gute Einweisung und vorheriges Üben ermöglichen
2	I1	0	0	0	0	0	0	1	1	1	0	0	0	1	1	1	0	0	0	1	1	1	0	0	0	0	0	0	3	33.3333	59.2912	69.0367			90	78	0.237486			1	2	0	2.66667	2	3	4	4	3	Die technische Handhabung ist ungewohnt und schränkt ein. Diese müsste mehr vereinfacht werden, oder man müsste regelmäßiger mit der Technik arbeiten.
3	I1	0	0	0	0	0	0	0	0	0	1	1	1	1	1	1	0	0	0	1	1	1	0	0	0	0	0	0	3	33.3333	60.0629	72.6667			70	90	1.05772	0.0981123	24	2	0	0	3	2	4	3	4	1	deutlich mehr vr basierte lehre. Das Theoretische medizinische abzurufen ist unrealistich in derart realen Situationen. regelmäßige vr Patientenbehandlung ermöglicht die Verbindung evtl
4	I2	1	1	1	0	0	0	0	0	0	0	0	0	1	0	1	0.5	0.5	0.5	0	0	0	0	0	0	0	0	0	2.5	27.7778			39.932	71.4286	70	85	-0.418701	-1.44637	24	2	0	0	2	4	4	2	4	4	mehr Infortmationen wie man bestimmte Anweisungen angibt bzw. auswählt
5	CO	1	1	1	0	0	0	1	1	1	0	0	0	1	1	1	0	0	0	0	0	0	0	0	0	0	0	0	3	33.3333					60	73	1.95998		23	1	0	0	3.33333	2	5	4	5	4	Vernünftige Übungszeiten, ausreichend viel Übung, um die Beeinflussung der fachlichen Leistung durch die Hindernisse der Bedienung chancengleich auszuschließen
6	CO	1	1	1	0	0.5	0.5	0	0	0	0	0	0	1	1	1	0	0	0	1	1	1	0	0	0	0	0	0	3.5	38.8889					60	83	-0.500725	0.860478		1	0	0.5	1.66667	4	2	4	5	2	Üben des Handlings müsste ermöglicht werden sowie Raumbegehung mit Anschauen und Aufmachen aller Schubladen, um Arbeitsumfeld kennenzulernen; schwierig finde ich, dass das reale Handling (Infusionen richten, Medikamente aufziehen, Zugänge legen, Abhörtechnik, Sonotechnik nicht mitgeprüft werden kann
7	I2	1	1	1	0	0	0	0	0	0	0	0	0	0	0	0	0.5	1	1	0	0	0	0	0	0	0	0	0	2	22.2222	40.555	70.5	55.5102	100	60	91	-0.910842		24	1	0	0	2	3	4	4	3	3	müsste schon gut im Studiumsverlauf implementiert sein, sodass man sich im 'Prüfungsraum' auskennt, Ressourcen kennt, wo diese sich befinden etc.
8	I1	1	1	1	0	0	0	0	0	0	0	0	0	0.5	0.5	0.5	1	1	1	0	0	0	0	0	0	0	0	0	2.5	27.7778	62.0138	73.6525			80	78	0.155463		29	2	0	0	3	2	4	4	5	2	Häufiges, strukturiertes training mit VR-basierten Inhalten. alle 1-2 wochen einen kurs um die routine im VR wie am echten patienten zu entwickeln. Nachteilsausgleich für Studenten die vegetativ auf VR reageiren
9	CO	0	0	0	0.5	0.5	0.5	0	0	0	0	0	0	1	1	1	0	0	0	0.5	0.5	0.5	0	0	0	0	0	0	2	22.2222					60	70	0.237486	-0.634063		2	10	0	1.66667	3	2	2	5	4	Viele Übungsszenarien, damit die Bedienung keinen Einfluss auf die letztliche Prüfung hat. Möglichst mehr 'Abläufe' prüfen als konkret simulierte 'Tätigkeiten' (Infusion zusammenstecken uvm).
10	I2	0	0	0	0	0	0	0	0	0	1	1	1	0	0	0	0	0	0	0	0	0	0	0	0	0	0	0	1	11.1111	63.68	74.0275	46.8367	100	30	23	0.31951	-0.377394	23	2	0	0	1.33333	1	1	1	5	5	Studierende müssen mit der Bedienung umfassend vertraut seibn und vollständige Kenntnis über die bei der Prüfung dargestellten Räumlichkeiten haben.
11	CO	0	0	0	0	0.5	0.5	0	0	0	0	0	0	0	0	0	0	0	0	0	0	0	0	0	0	0	0	0	0.5	5.55556							0.0734396	-1.01395	23	2	0	0.5	1.66667	5	4	3	4	3	Training und Einweisung
12	I1	0	0	0	0	0.5	0.5	0	0	0	0	0	0	0	0	0	0	0	0	0	0	0	0	0	0	0	0	0	0.5	5.55556	56.7088	66.6667			70	63		1.73386		1	0	0	1.5	5	3	4	3	2	Ausreichend Übungsmöglichkeiten, um den Umgang mit der Harware zu üben
13	I1	0	0	0	0	0	0	0	0	0	1	1	1	0	0	0	0	0	0	0	0	0	0	0	0	0	0	0	1	11.1111	61.375	72.2857			80	94	0.237486	0.114859	22	1	0	0	3	2	3	2	5	4	Möglichkeit zu üben
14	I2	1	1	1	0	0	0	0	0	0	0	0	0	1	1	1	0	0	0	0	0	0	0	0	0	0	0	0	2	22.2222	56.6525	68.3333	36.8367	42.8571	60	78	-0.828818		27	1	0	0	3	2	3	4	3	4	auch echte Fallprüfungen als Übung
15	CO	1	1	1	0	0	0	0	0	0	1	1	1	1	1	1	0	0	0	0	0	0	0	0	0	0	0	0	3	33.3333					70	98	0.729627	-0.596173	22	1	0	0	1	4	3	4	3	2	Vorher Übungen mit der VR-Brille, um zu vermeiden, dass man aufgrund technischer Probleme/Unsicherheiten sich nicht auf die Aufgabe konzentrieren kann. Außerdem wäre es gut wenn man sich einigermaßen sicher bzw. vertraut in der umgebung fühlt um genau zu wissen wo was steht.
16	I2	0	0	0	0.5	1	1	0	0	0	0	0	0	1	1	1	0	0	0	0	0.5	0.5	0	0	0	0	0	0	2.5	27.7778	57.7638	75.5	37.9932	100	80	83	-0.992865	-0.643325	24	1	0	0	2	3	3	2	4	4	vertrautheit mit der bedienung
17	I2	1	1	1	0	0	0	0	0	0	0	0	0	0	0.5	0.5	0.5	0	0.5	0	0	0	0	0	0	0	0	0	2	22.2222	51.82	72.6667	55.1701	71.4286	70	74	-0.746795	0.420628	22	1	0	0		2	4	3	5	4	Einführung in die Programme und in die Hardware, um für alle einen gleichen Grundbaustein zu setzen.
18	I2	1	1	1	0.5	0.5	0.5	0	0	0	0	0	0	1	0.5	1	1	1	1	0.5	0.5	0.5	0	0	0	0	0	0	4	44.4444	68.875	68	53.5034	100	90	73	-1.07489	-0.272357	25	1	0	0	2	4	3	3	4	3	Vorher ausreichend Übung, um mit der Hard- & Software vertraut zu sein
19	CO	0	0	0	0	0.5	0.5	0	0	0	0	0	0	0.5	0.5	0.5	0	0	0	0	0	0	0	0	0	0	0	0	1	11.1111					70	90	0.893674	0.665732	23	1	0	0	2	4	4	3	4	3	Mehr Traibibg ubd auch Untericht VR basiert
20	I2	1	1	1	0	0	0	0	0	0	0	0	0	0	0	0	0	0	0	0	0	0	0	0	0	0	0	0	1	11.1111	47.8042	77.466	34.7959	71.4286	70	87	-0.336678	0.0516991	25	1	0	0	2	2	4	3	4	3	Sehr gute Einführung in die Handhabung/Umgang mit der VR, damit diese die Leistung nicht beeinflusst. Daher sind mehrere Übungen vor den Prüfungen wichtig
21	I1	0	0	0	0	0	0	0	0	0	0	0	0	1	1	1	0	0.5	0.5	0.5	0.5	0.5	0	0	0	0	0	0	2	22.2222	63	70.6667			60	68	-0.746795		24	2	100	0	1.66667	4	4	2	5	3	Als Prüfungssituation schwierig, denke es erhöht für zu viele zusätzlich den Druck vor Prüfungen. Bei Fragen müsste immrt grholfrn werden oder auch mündliche Beschreibungen zählen
22	I2	0	0	0	0	0.5	0.5	0	0	0	1	1	1	1	0.5	1	0	0	0	0.5	0.5	0.5	0	0	0	0	0	0	3	33.3333	69.5	80.5	51.7347	100	40	70	-0.336678	-0.727368	22	2	0.3	0	4	1	1	2	5	4	Vorherige Übung in Kursen und damit einhergehend fallbasiertere Lehre
23	I2	1	1	1	0	0	0	0	0	0	0	0	0	0	0.5	0.5	0	0	0	0	0	0	0	0	0	0	0	0	1.5	16.6667	54.4725	73.6	26.8367	71.4286	70	83	-0.418701		33	2	0	0.5	3	3	3	4	5	5	Man müsste die Handhabung noch etwas verbessern, sodass man Gegenstände besser greifen kann, einrasten etc.
24	CO	1	1	1	0	0	0	0	0	0	0	0	0	0	0.5	0.5	0	0	0	0	0	0	0	0	0	0	0	0	1.5	16.6667					50	63	0.31951			1	0	0	2	3	2	2	5	4	mehr übung mit den geräten und den fallbeispielen
25	CO	0	0	0	0	0	0	0	0	0	0	0	0	1	1	1	0	0	0	0	0	0	0	0	0	0	0	0	1	11.1111					80	97	0.237486		26	1	0	0	1.66667	5	5	5	3	2	viel Übung mit der Hard- und Software
26	CO	1	1	1	0	0	0	0	0	0	0	0	0	1	1	1	0	0	0	1	1	1	0	0	0	0	0	0	3	33.3333					50	78	0.0734396		23	1	0	0	1	5	4	2	5	5	Dass man davor konkret erklärt bekommt, wie man jetzt z.B. Infusionen anhängt, Blutkulturen abnimmt etc. Am besten hat man zuvor schon 3-4 mal VR-basiert trainiert.
27	I2	1	1	1	0	0	0	0	0	0	0	0	0	1	1	1	0	0.5	0.5	0	0	0	0	0	0	0	0	0	2.5	27.7778	47.055	54.25	46.7007	71.4286	70	78	-0.828818	0.253326	24	1	0	0	2	3	3	3	4	3	Mehr Zeit , größere Räume, mehr Übungmöglichkeiten vor der Püfungen
28	I1	1	1	1	0	0	0	0	0	0	0	0	0	0	0.5	0.5	1	1	1	0	0	0	1	1	1	0	0	0	3.5	38.8889	52.3657	74.6667			60	87	-0.0906073		31	2	0	0		3	4	2	5	4
29	CO	0	0	0	0	0.5	0.5	0	0	0	0	0	0	0.5	0.5	0.5	0	0	0	0	0	0	0	0	0	0	0	0	1	11.1111					80	68	-0.00858385	1.42037	24	1	0	0	2	5	4	4	5	3	man bräuchte viel Übungszeit, damit die technische Handhabung nicht im Vordergrund steht, sondern der Inhalt
30	I2	1	1	1	0	0	0	0	0	0	0	0	0	0	0	0	0	0	0	0.5	0.5	0.5	0	0	0	0	0	0	1.5	16.6667	52.8612	71.622	28.5034	100	90	95	-0.664771			1	1	0	3	2	2	2	5	3	Studierende müssen ausreichend Übungszeit bekommen, bis sie sich im Umgang sicher fühlen. Programm darf keine Fehler oder Bucks haben
31	CO	1	1	1	0	0.5	0.5	0	0	0	0	0	0	1	1	1	0	0	0	0	0	0	0	0	0	0	0	0	2.5	27.7778					70	78	-0.910842	0.168929	23	1	0	0	2	2	4	4	5	4	Vorherige ausführliche Einführung in die Prüfungsumgebung/Bedienung.
32	CO	0	0	0	0	0	0	0	0	0	0	0	0	1	1	1	0	0	0	0	0	0	0	0	0	0	0	0	1	11.1111					75	88	-0.00858385		23	1	0	0							mehr verpflichtende Übungen und Vorbereitungen im Studium und im Rahmen von Praktika um gut auf Prüfungen vorbereitet zu sein und natürlich generell überhaupt erstmal VR Angebote im Rahmen des Studiums
33	CO	1	1	1	0	0	0	0	0	0	0	0	0	1	1	1	0	0	0	0	0	0	0	0	0	0	0	0	2	22.2222					50	68	0.483557	0.907671	25	2	12	0	2	2	4	5	4	4	Eine ausreichende und regelmäßige Möglichkeit mit der Soft und Hardware zu Üben um einen routinierten Umgang in einer Prüfungssituation zu gewährleisten
34	CO	0	0	0	0	0	0	0	0	0	0	0	0	1	1	1	0	1	1	0	0	0	0	0	0	0	0	0	2	22.2222					60	74	-0.254654			2	0	0	2	1	1	1	5	5	Übungsmöglichkeiten während des Studiums Teamarbeit
35	CO	0	0	0	0	0	0	0	0	0	1	1	1	0	0	0	0	0	0	0	0	0	0	0	0	0	0	0	1	11.1111					70	83		1.18691	23	1	1	0	1	4	5	4	5	5	Es müsste vorher auch mit der Software geübt werden, damit das VR-Unwissen das fachliche Wissen nicht überschattet. Ich wusst zum Beispiel teilweise was ich machen will, aber wusste nicht genau wie ich es umsetzen sollte im VR-RAum, z.B. Blutabnahme oder Sono mit vorher entkleiden.
36	CO	1	1	1	0	0	0	0	0	0	0	0	0	1	0.5	1	0	0	0	0.5	0.5	0.5	0	0	0	0	0	0	2.5	27.7778					60	73	1.54986			1	5	0	3	5	4	4	5	1	Sicherheit im Umgang mit der Technik, Viele Übungssimulationen
37	CO	0	0	0	0	0	0	0	0	0	0	0	0	0.5	0.5	0.5	0	0.5	0.5	0	0	0	0	0	0	0	0	0	1	11.1111					50	78	0.401533		23	1	0	0	2	3	5	4	5	3	vor der Prüfung umfangreiche Kurse mit den VR Geräten, dass man sich im Umgang wirklich sicher fühlt. Wahrscheinlich mindestens 5-7 Kurse im Vorfeld
38	CO	0	0	0	0	0	0	0	0	0	0	0	0	0	0	0	1	1	1	0	0	0	0	0	0	0	0	0	1	11.1111					80	85	0.401533		26	2	10	0	2	3	4	4	5	3	noch bessere Bedienbarkeit und Interaktionsmöglichkeiten mit der Umgebung
39	I2	1	1	1	0	0	0	0	0	0	0	0	0	0	0.5	0.5	0	0	0	0	0	0	0	0	0	0	0	0	1.5	16.6667	56.125	75	37.6531	100	80	85	-0.500725		28	1	0	0	2.5	2	3	4	5	2	viele Übungsmöglichkeiten und -Szenarien, Feed-Back und Schrit-für-Schritt-Instruktionen bzgl. fachlichem Vorgehen
40	I2	1	1	1	0	0	0	0	0	0	0	0	0	1	0.5	1	0	0	0	0	0	0	0	0	0	0	0	0	2	22.2222	50.93	65	41.2245	71.4286	80	92	-0.336678	-0.351554	28	1	0	0		4	4	4	5	2	bessere Hardware bzw. einfacheres Handling. Hat teilweise Geschwindigkeit behindert.
41	I2	1	1	1	0	0	0	0	0	0	0	0	0	0	0.5	0.5	0	0	0	0	0	0	1	1	1	1	1	1	3.5	38.8889	64.9862	74.1388	56.4966	100	65	83	-0.336678		29	1	0	0	2	1	2	1	5	4	Es dürfte nicht an technischen Dingen scheitern, wie dem schelchten Greifen von Gegenständen oder ähnlichem. Es sollte nur die fachliche Leistung zählen und nicht das technische Handling während der VR-Situation.
42	I2	1	1	1	0	0	0	0	0	0	0	0	0	0	0.5	0.5	0	0	0	1	1	1	0	0	0	0	0	0	2.5	27.7778	50.305	70	35.034	100	75	83	-0.582748		22	2	0	0	2	4	2	4	5	3	bis ins letzte Detail Erklärungen ohne Zeitdruck was möglich ist plus sehr viele Übungen eingebaut ins Studium zu verschiedenen Zeitpunkten; wenn man auf diese Weise vllt 10 Patienten bearbeiutet hat, könnte ich mir auch vorstellen, dass einzelne Aspekte (an was wurde gedacht und in welcher Reihenfolge, aber nicht wie schnell) als Prüfungsleistung zählen
43	CO	0	0	0	0.5	0.5	0.5	0	0	0	0	0	0	0	0	0	1	1	1	0.5	0.5	0.5	0	0	0	0	0	0	2	22.2222					60	87			24	1	0	0		4	4	4	5	4	Ausgeprägtes Training vorab (mehrere freie Übungsstunden), damit das Agieren im VR-Modus automatisiert ablaufen kann.
44	I1	1	1	1	0	0	0	0	0	0	0	0	0	1	1	1	0	0	0	0	0	0	0	0	0	0	0	0	2	22.2222	53.7088	72.5			90	74	-0.254654		25	1	0	0	1.66667	4	5	4	4	4	Häufiger Umgang mit der VR-Technologie, wie unbegrentzte Übungsmöglichkiet vor der Prüfung.
45	I1	0	0	0	0.5	0.5	0.5	0	0	0	0	0	0	1	1	1	0	0	0	0	0	0	0	0	0	0	0	0	1.5	16.6667	51.9588	70.312			83	63	-0.254654	0.584155	24	1	0	0	1.33333	5	5	5	3	1	Die Bedienung der Technik hat mich überfordert. Konnte die Beschriftungen nicht gut lesen und wusste auch gar nicht, was man tun muss, um zB einen Zugang zu legen etc. Das kostet schon viel Zeit, die einem in der Prüfung dann fehlt.
46	I2	1	1	1	0	0	0	0	0	0	1	1	1	0	0.5	0.5	0	0	0	0	0	0	0	0	0	0	0	0	2.5	27.7778	57.195	71.3883	35.9184	100	80	88	-0.00858385	-0.0135964	24	1	0	0	2	1	1	1	5	5
47	I1	1	1	1	0	0	0	0	0	0	1	1	1	0	0	0	0	0	0	0	0	0	0	0	0	0	0	0	2	22.2222	62.555	74			75	87	4.50271	0.634459	26	2	1	1	3	3	3	4	4	5	man müsste mehr Veranstaltungen haben, die einen auf VR vorbereiten. Dass jeder auf dem neuen Stand ist. und vor jeder prüfung sollte die Bedienung nochmal wiederholt werden oder man sollte sich im raum frei bewegen können, um vor der Prüfung die Bedienung nochmal zu üben.
48	CO	0	0	0	0.5	0.5	0.5	0	0	0	0	0	0	0	0	0	0	0	0	0	0	0	0	0	0	0	0	0	0.5	5.55556					5	78	0.401533	1.09721	23	1	0	0	1	4	4	4	2	1	sprechen, patienteninteraktion, interaktion mit medizinischem personal
49	I1	0	0	0	0	0	0	0	0	0	1	1	1	0.5	0.5	0.5	0	0	0	0	0	0	0	0	0	0	0	0	1.5	16.6667	56.305	65.2			70	73	-0.418701	0.771196	22	1	0	1	2.33333	1	1	2	4	4	Umgang mit der VR Technik schon in den Praktika erlernen
50	CO	1	0	1	0	0	0	0	0	0	1	1	1	1	1	1	0	0	0	0	0	0	0	0	0	0	0	0	3	33.3333					60	83	-0.664771	0.156618	22	1	0	0	2	5	4	5	3	2	Übungseinheiten zur sicheren Erlernung des VR-Konzepts (unabhängig vom klinischen Kontext), Fallbeispielübungen zur Vorbereitung
51	CO	1	1	1	1	1	1	0	0	0	0	0	0	1	0.5	1	0	0	0	1	1	1	0	0	0	0	0	0	4	44.4444					60	68	-0.500725	-0.442228	27	2	60	0	1	4	2	1	5	5	einsatz aller Gliedmaßen, bspw. Knie um Svhublade zu schließen Training der Studierenden vor Prüfung um Bedienfehler zu minimieren
52	I1	1	1	1	0	0	0	0	0	0	0	0	0	0.5	0.5	0.5	1	1	1	0	0	0	0	0	0	0	0	0	2.5	27.7778	52.18	70.6112			70	88	-0.336678	-0.418763	22	1	0	0	2	4	4	2	5	2	'- Vorbereitung und mehrfache Übung im VR-Notfall-Szenario
53	I1	0	0	0	0	0	0	0	0	0	0	0	0	1	1	1	0	0	0	0	0	0	0	0	0	0	0	0	1	11.1111	47.68	51.3338			30	48	2.86224		29	2	0	0	4	3	5	3	3	3	regelmäßige Anwendung, Alternativen für Prüflinge denen dabei schlecht wird, sicheres Beherrschen, Erfahrung mit der Auswertung und dem Wissen worauf es ankommt
54	I2	1	1	1	0	0	0	0	0	0	0	0	0	1	1	1	0	0	0	0	0	0	0	0	0	0	0	0	2	22.2222	47.4725	64.6667	45.5102	85.7143	70	83	-0.992865	-0.284345	26	1	0	0	2	4	4	4	4	1	Praktisches Üben und gutes Kennen der Umgebung
55	I1	0	0	0	0	0	0	0	0	0	0	0	0	1	1	1	0.5	0.5	0.5	0	0	0	0	0	0	0	0	0	1.5	16.6667	65.7143	71.5			60	92	0.483557	-0.485971	20	2	100	0		2	4	1	5	5	nichts, ich finde es auch jetzt schon geeignet.
56	CO	1	1	1	0	0	0	0	0	0	0	0	0	0	0	0	0	0	0	0	0	0	0	0	0	0	0	0	1	11.1111									30	1	0	0	2	5	4	5	5	1	Man muss das vorher trainieren. Wissen wie was geht. Beim ersten Versuch macht man nur Quatsch und braucht unheimlich lange für die einfachsten Sachen.
57	I2	1	1	1	0	0	0	0	0	0	0	0	0	0.5	0.5	0.5	0	0	0	0.5	0.5	0.5	0	0	0	1	1	1	3	33.3333			43.2653	100	80	82	-0.910842			1	0	0	3	1	1	1	4	3	Vor Prüfungen müssten alle Studierende die Möglichkeit bekommen sich länger mit VR zu beschäftigen, da es am Anfang sehr ungewohnt ist.
58	I1	1	1	1	0	0	0	0	0	0	0	0	0	1	0.5	1	0	0	0	0	0	0	0	0	0	0	0	0	2	22.2222	46.57	79			70	94	0.56558		24	1	0	0		2	3	2	5	4
59	I1	0	0	0	0	0.5	0.5	0	0	0	0	0	0	1	0.5	1	0	0	0	1	1	1	0	0	0	0	0	0	2.5	27.7778	44.7143	67.4162			90	98	-0.500725	0.251899	22	1	0	0	2	4	4	4	4	3	Lieber Ansagen machen was zu tun ist und das wird dann für einen übernommen, damit hat man mehr Fokus auf das fachliche und weniger auf das technische
60	I1	0	0	0	0	0	0	0	0	0	1	1	1	0	0	0	0	0	0	0	0	0	0	0	0	0	0	0	1	11.1111	55.2857	72.066			90	68		0.376747	22	1	0	0	1	5	4	5	4	2	Es müsste von beginn des Studiums als Tool eingebaut werden. Bei Studierenden ohne viel Vorerfahrung mit Computerspielen scheint mir, auch aus persönlicher Erfahrung nun, die Handhabung der Geräte zu schwierig, sodass sie die persönliche medizinische Leistung minder
61	I2	0	0	0	0	0.5	0.5	0	0	0	1	1	1	0.5	0.5	0.5	0	0	0	0	0	0	0	1	1	0	0	0	3	33.3333	58.875	63.5	49.1497	42.8571	50	73	-0.828818	-0.187753	24	1	0	0	1.66667	3	3	2	4	2	Möglichkeit zur tatsächlichen Kommunikation mit den Patienten (Rückfragen, Anamnese ausführlicher etc.); weitere Übungsmöglichkeiten im Standardcurriculum, um für alle ähnliche Voraussetzungen zu ermöglichen (Sicherheit im Umgang mit der Lernumgebung etc.)
62	I2	0	0	0	0	0.5	0.5	0	0	0	0	0	0	0	0.5	0.5	0	0	0	0	0	0	0	0	0	0	0	0	1	11.1111	44.8338	73	47.3469	71.4286	50	73	-0.828818	-0.113249	23	1	0	0	1.66667	3	4	3	5	4	mehr Angebote in der Uni bzw. Eindindung in die Lehre
63	CO	0	0	0	0	0	0	0	0	0	0	0	0	1	1	1	0	0.5	0.5	0	0	0	0	0	0	0	0	0	1.5	16.6667					50	70	1.46784		22	1	0	0		4	3	2	5	4	Integration der VR Technologie ins Studium, um mit der Handhabung schon vorab klarzukommen, größerer Raum, um nicht so schnell zu kollidieren, bisschen bessere Teleportation, evtl Möglichkeit mehrere Dinge in die Hand zu nehmen
64	CO	1	1	1	0	0	0	0	0	0	0	0	0	1	1	1	0	0	0	0	0	0	0	0	0	0	0	0	2	22.2222					70	87	-0.828818		25	1	0	0	1.66667	5	5	5	3	2	Umgang mit VR-Brille, Bedienung der Kontoller und wie wan genau im Zusammenspiel funktioniert müsste zuvor sehr häufig und gut trainiert werden. Erst wenn durch die Durchführung mit der vorhandenen Technik es keine Ablebkungspunkte mehr gibt und die Konzentration nicht nur für die technischen Gegebenheiten gebraucht wird, kann man sich auf das medizinische Konzentriern, das in einem Prüfungsramen…
65	I2	1	1	1	0	0	0	0	0	0	1	1	1	1	1	1	0	0	0	0.5	0.5	0.5	0	0	0	0	0	0	3.5	38.8889	58.1388	66.195	58.1633	100	80	87	-0.746795	-0.377394	22	1	30	0	2	2	2	1	5	5	z.B. Messung der Sauerstoffsättigung im Blut (Wann lässt sich der Sensor anbringen, wann nicht?) evtl. manche Tätigkeiten detaillierter (Blutentnahme? Zugang legen? Platz für EKG Elektroden nicht angezeigt)
66	I2	0	0	0	0	0.5	0.5	0	0	0	1	1	1	1	1	1	0	0	0	1	1	1	0	0	0	0	0	0	3.5	38.8889	57.945	67.75	56.8707	85.7143	60	93	-0.992865	-0.64082	23	1	0	0	1.33333	4	2	2	5	2	mehr Übung und Training im Umgang mit der Software aktuell ist es zwar freiwillig möglich, aber da es noch nicht prüfungsrelevant ist, wird es eher weniger genutzt. ich habe es bisher auch noch nie genutzt, würde es aber, wenn ich wüsste, dass es prüfungsrelevant wäre. Nur um üben zu können
67	CO	1	1	1	0	0	0	0	0	0	0	0	0	1	1	1	0	0	0	0	1	1	0	0	0	0	0	0	3	33.3333					40	52	0.0734396		23	2	20	0	2	1	1	1	5	4	leichte Software Verbesserung, damit Aktionen besser registriert werden, z.b Aufhängen der Infusion ohne herunterfallen
68	I1	0	0	0	0	0	0	0	0	0	0	0	0	1	1	1	0	0	0	0	0	0	0	0	0	0	0	0	1	11.1111	48.875	67.75			80	78	-0.00858385		23	1	0	0	1	4	5	4	4	4	prüfung ist schwierig, da Leistung stark von den technischen und orientierungsfähuigkeit abhängt, fachwissen gerät erstmal in den hintergrund
69	I2	1	1	1	0	0	0	0	0	0	0	0	0	0.5	0.5	0.5	0.5	0.5	0.5	0	0	0	0	0	0	0	0	0	2	22.2222	27.8571	34.8612	38.3673	57.1429	50	83	-0.910842		24	1	0	0	3	3	4	3	5	4
70	CO	0	0	0	0	0	0	0	0	0	0	0	0	1	0.5	1	0	0	0	0	0	0	0	0	0	0	0	0	1	11.1111					60	88	2.61617		21	1	1	0	1	3	5	5	4	2	viel mehr Übungszeit um sich an die VR Bedienung zu gewöhnen
71	I2	1	1	1	0.5	0.5	0.5	0	0	0	0	0	0	0.5	0.5	0.5	1	1	1	0	0	0	0	0	0	0	0	0	3	33.3333	44.4286	72	36.8367	100	50	93	-0.664771	-0.770514	26	2	0	0		2	2	1	5	4	Gutes Training, realer Zeitdruck beimumfang der Aufgabe
72	I1	1	1	1	0	0	0	0	0	0	0	0	0	1	1	1	0	0	0	0	0	0	0	0	0	0	0	0	2	22.2222	50.7225	65.5			70	38	0.647604		31	1	0	0	2	4	5	5	4	3	Regelmäßiges VR-Training, um sehr vertraut damit zu sein
73	I1	0	0	0	0.5	0.5	0.5	0	0	0	0	0	0	1	1	1	0	0	0	0	0	0	0	0	0	0	0	0	1.5	16.6667	56.4162	74.1667			80	88	2.20605	0.0991417	25	1	30	0	2.33333	4	4	4	5	2	Man müsst im vorhinein sicher wissen, wie die bedienung der einzelnen maßnahmen und utensilien funktioniert. z.b. Zugang legen ohne desinfektion, Urinprobe durch urinröhrchen auf den bauch der pat halten, ... der limitierende faktor war für mich nicht das wissen, was ich tun muss, sondern a) die Zeit (relativ realistisch) und b) die Bedienung des Programms - WIe mache ich was?
74	I1	1	1	1	0	0	0	0	0	0	1	1	1	0	0.5	0.5	0	0	0	0	0	0	0	0	0	0	0	0	2.5	27.7778	49.3612	75			70	90	-0.00858385	0.480011	24	1	0	0	2	2	5	4	5	2	Man müsste VR Tools in die Lehre integrieren, damit man einen sehr sicheren Umgang damit hat und faire Prüfungen sicherstellen könnte.
75	I2	0	1	1	0	0	0	0	0	0	1	1	1	1	1	1	1	1	1	0	0	0	0	0	0	0	0	0	4	44.4444	68.25	84.5	55.5102	71.4286	80	80	-1.07489	-0.408753	26	2	300	0	3	1	4	1	5	4	Häufige und regelmäßige Trainings im Vorfeld zu der Prüfung mit der Softeware und VR-Umgebung. Schulung zu den möglichkeiten die im VR Szenario bestehen.
76	I1	0	0	0	0	0	0	0	0	0	0	0	0	0	0	0	0	0	0	0	0	0	0	0	0	0	0	0	0	0	56.8888	69.3333			30	62	1.05772		24	2	0	0.5		2	3	1	5	3	falls technisch umsetzbar: direkte Kommunikation mit dem Patienten/ der Patientin bessere Haptik beim Blutabnehmen, etc.
77	I1	0	0	0	0	0	0	0	0	0	0	0	0	1	1	1	0	0	0	0	0	0	0	0	0	0	0	0	1	11.1111	47.7143	65.6667			90	97	0.56558		24	1	0	0	4	4	2	2	4	4	ausreichend Übungen sich mit der VR-Notaufnahme vertraut zu machen. Man müsste genau wissen was man alles für Möglichkeiten hat und in wiefern sich die Tätigkeiten von denen in der chten Notaufnahme unterscheiden (z.B Blut abnhemen - Blut wegschicken?)
78	I1	0	0	0	0	0	0	0	0	0	0	0	0	0	0	0	0	0	0	0	0	0	0	0	0	0	0	0	0	0	60.6112	67			70	68	0.237486		22	1	0	0	2	3	2	2	5	5	genauer vorher Wissen, welche Möglichkeiten man mit dem VR-Szenario hat, muss alles wirklich genauso sein wie in echt oder können manche Aktionen vereinfacht absolviert werden. Beispiel Blutabnehmen: es gab nicht alle in real verwendeten MAterialen in VR, wie soll ich das Blut dann abnehmen? Gibt es 'Abkürzungen' in VR?
79	CO	1	1	1	0	0	0	0	0	0	0	0	0	1	1	1	0	0	0	0	0	0	0	0	0	0	0	0	2	22.2222					60	70	-0.582748	-0.217136	22	1	2	0	2	1	2	1	4	3	Hilfestellungen, wenn man fachliche Schwierigkeiten hatte. Generell würden mir Rückmeldungen helfen, ob das sinnvoll ist.
80	I2	1	1	1	0	0	0	0	0	0	1	1	1	1	0.5	1	0	0.5	0.5	0	0	0	1	1	1	0	0	0	4.5	50	65.75	61.6667	50.4082	100	70	98	-0.910842	-0.872163	28	2	15	1	3	1	3	1	4	5	Viel Möglichkeit zum Üben
81	I2	1	1	1	0	0	0	0	0	0	0	0	0	1	0.5	1	0	0	0	1	1	1	0	0	0	0	0	0	3	33.3333	56.125	66.5275	39.2177	100	85	78	-0.664771		25	1	20	0	1.66667	4	4	2	4	4	Möglichkeiten, vielfältig mit einer solchen Software trainieren, damit die räumliche Orientierung und Bedienung gut geschult werden kann. (damit kann man sich 100% auf den Fall konuentrieren)
82	I1	1	1	1	0	0	0	0	0	0	0	0	0	0.5	0.5	0.5	0	0	0	0	0	0	0	0	0	0	0	0	1.5	16.6667	56.2912	58.3333			80	72	0.811651		35	1	0	0	3	2	2	3	5	2
83	I1	1	1	1	0	0.5	0.5	0	0	0	0	0	0	1	1	1	1	1	1	0	0	0	0	0	0	0	0	0	3.5	38.8889	62.625	68					-0.582748	-1.18435	29	2	100	0.5	3	2	4	2	5	3	Mehr Umgang Verfeinerung des haptischen Feedback, Sachen fallen aus der Hand.
84	I2	1	1	1	0	0	0	0	0	0	0	0	0	0.5	0	0.5	0	0	0	0	0	0	1	1	1	1	1	1	3.5	38.8889	56.7912	71.8	54.5578	100	90	95	-0.910842	-0.55318	23	1	0	0		2	1	2	5	5	kosten vllt?
85	CO	1	1	1	0	0.5	0.5	0	0	0	1	1	1	1	0.5	1	0	0	0	0	0	0	0	0	0	0	0	0	3.5	38.8889					40	67	-0.582748	-0.591979	24	1	0	0	1.66667	4	4	2	5	4	Man müsste öfter im Rahmen von Praktika mit VR arbeiten, damit es nicht daran scheitert eine Schublade aufzuziehen.
86	I1	0	0	0	0	0.5	0.5	0	0	0	0	0	0	0.5	0.5	0.5	0	0	0	0	0	0	0	0	0	0	0	0	1	11.1111	65.32	72.9725			20	27	-0.828818	-0.0678198	23	2	3	0	1.66667	2	2	1	5	4	Handling zu bedienender Elemente in einem Tutorial tatsächlich angwandt im Vornhinein. Also statt Blöcke und Kreuze anvisieren im Tutorial zusätzlich eher das Üben bspw. folgender Dinge: verbinden der Kanüle mit der Monovette oder das softwargleiche mannövrieren mit dem Daumenknopf, statt dem Seitknopf, manövrieren im virtuell weiteren Raum als physisch begrenzter Raum (Die tutorials waren eher s…
87	I2	1	1	1	0	0	0	0	0	0	1	1	1	1	1	1	0	0	0	0	0	0	0	0	0	0	0	0	3	33.3333	51.3	67.2	45.1361	100	45	59	-1.07489	-0.0385614	23	1	0	0		5	3	4	5	3	Häufiger EInsatz von VR in Seminaren und im Studium, um sich mit der Technik und den Behandlungsoptionen auszukennen und diese somit routiniert angewendet werden können.
88	CO	0	0	0	0	0	0	0	0	0	0	0	0	1	1	1	0	0.5	0.5	0	0	0	0	0	0	0	0	0	1.5	16.6667					40	68	-0.0906073		21	1	0	1	3	2	5	4	4	4	frei zugänglicher Zugsng zu Trainingsmöglichkeiten mit der VR um den Umgang zu verinnerlichen, damit es bei der Prüfung nicht an der Bedienung scheitert
